# Supplementary material for: Middle Jurassic (Bajocian) planktonic foraminifera from the northwest Australian margin
Source: Copernicus journal article supplement (doi:10.5194/jm-39-93-2020), 2020-07-08
Supplement: Supplementary file 1 [file jm-39-93-2020-supplement.zip]

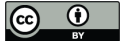

## *Supplement of*

# **Middle Jurassic (Bajocian) planktonic foraminifera from the northwest Australian margin**

**Marjorie Apthorpe**

*Correspondence to:* Marjorie Apthorpe ([marjorieapthorpe@gmail.com](mailto:marjorieapthorpe@gmail.com))

- [jm-39-93-2020-supplement-title-page.pdf](#)
- [M10-24=m10-m-21 copy.tif](#)
- [M10-30=m10-d-14 copy.JPG](#)
- [M10-30=m10-m-01.tif](#)
- [M10-30=m10-m-09 copy.tif](#)
- [M10-30=m10-m-11 copy.tif](#)
- [M10-30=m10-m-13 copy.tif](#)
- [M2-16=m52-a-24 copy.JPG](#)
- [M32-27=m52-a-01 copy.JPG](#)
- [M5-07=m5-a-\\_14 copy.jpg](#)
- [M86-19=m86-b-04.tif](#)
- [M86-19=m86-b-28.tif](#)
- [m10-24si copy.tif](#)

The copyright of individual parts of the supplement might differ from the CC BY 4.0 License.
